# Supplementary material
Source: ML conference proceedings conference paper supplement (https://openaccess.thecvf.com/content/CVPR2023/html/Kong_vMAP_Vectorised_Object_CVPR_2023_paper.html)
Supplement: Supplementary file 1 [file Kong_vMAP_Vectorised_Object_CVPR_2023_supplemental.zip]

Archive with 2 entries (2 files):
- output.mp4
- vMAP_sup_2023054809.pdf
